# Supplementary material for: Nitrogen versus carbon in planar pentacoordinate environments supported by Be5Hn rings
Source: Royal Society of Chemistry journal article supplement (doi:10.1039/d1ra02178h), 2021-01-01
Supplement: d1ra02178h1.pdf [file d1ra02178h1.pdf]

Supporting Information

**Nitrogen *versus* carbon in planar pentacoordinate environments**

**supported by Be<sub>5</sub>H<sub>n</sub> rings**

Jian-Hong Bian,<sup>a</sup> Bo Jin,<sup>a</sup> Xue-Feng Zhao,<sup>b</sup> Rui Sun,<sup>a</sup> Caixia Yuan,<sup>a</sup> Cheng-Yong  
Zhou<sup>b</sup> and Yan-Bo Wu<sup>\*ab</sup>

- a. Key Laboratory of Materials for Energy Conversion and Storage of Shanxi Province, Institute of Molecular Science, Shanxi University, Taiyuan, 030006, People's Republic of China.
- b. Department of Chemistry, Changzhi University, Changzhi, Shanxi 046011, People's Republic of China.

E-mail: [wyb@sxu.edu.cn](mailto:wyb@sxu.edu.cn)

**Table of contents**

- Fig. S1** Optimized structures of the ppC analogue species CBe<sub>5</sub>H<sub>n</sub><sup>n-4</sup> ( $n = 2-5$ ) at the B3LYP/aug-cc-pVTZ level.
- Fig. S2** The results of ELF analysis for **2A-5A**.
- Fig. S3** Optimized structures and the relative energies of **1A-5A** and their four lowest isomers.
- Fig. S4** The five independent 20 ps BOMD simulations of **2A-5A** at 500 K.
- Fig. S5** The energy profile for the generation of **4C** from **4A**.
- Cartesian coordinates of optimized structures of the species reported in the text.

**Fig.S1** Optimized structures of the ppC analogue species  $\text{CBe}_5\text{H}_n^{n-4}$  ( $n = 2-5$ ) at the B3LYP/aug-cc-pVTZ level.

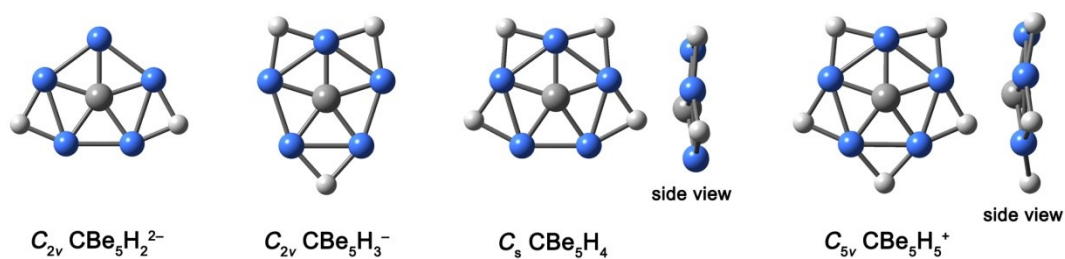

**Fig.S2** The results of ELF analysis for **2A–5A** with the bifurcation values examined within  $\text{NBe}_5$  moiety.

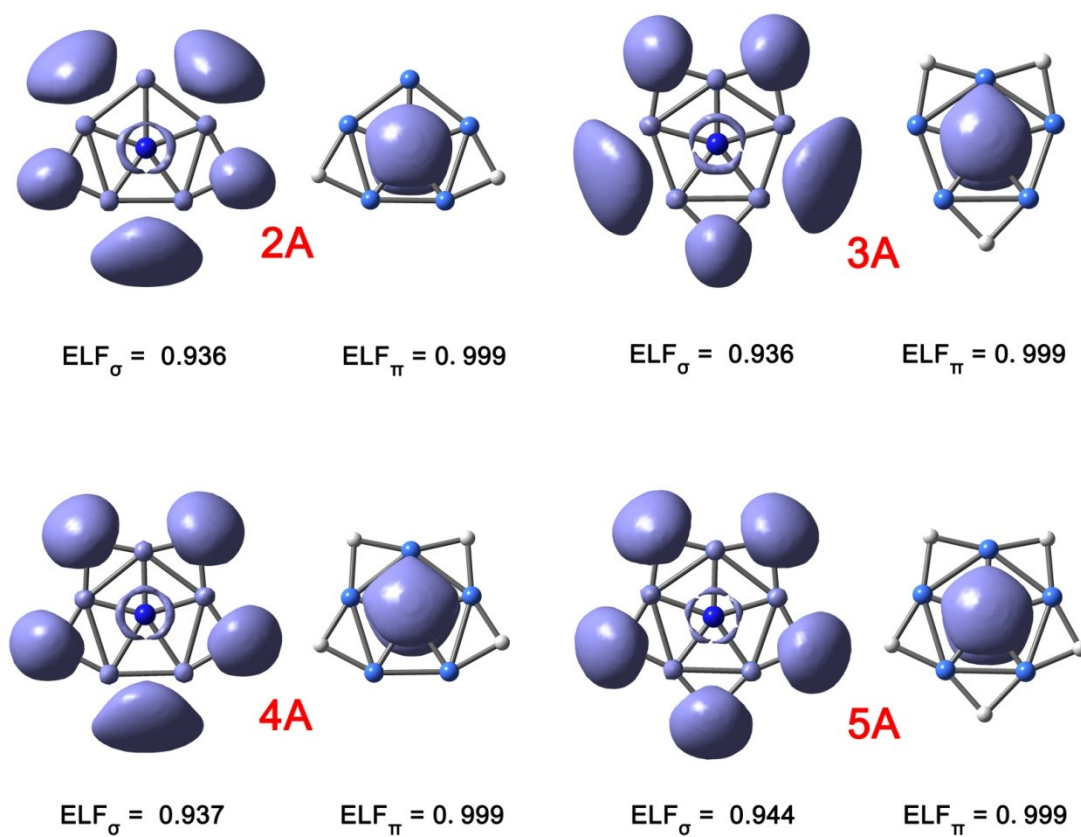

**Fig.S3** Optimized structures of **1A–5A** and their four lowest isomers. The relative energies (kcal/mol) were calculated at the CCSD(T)//B3LYP level.

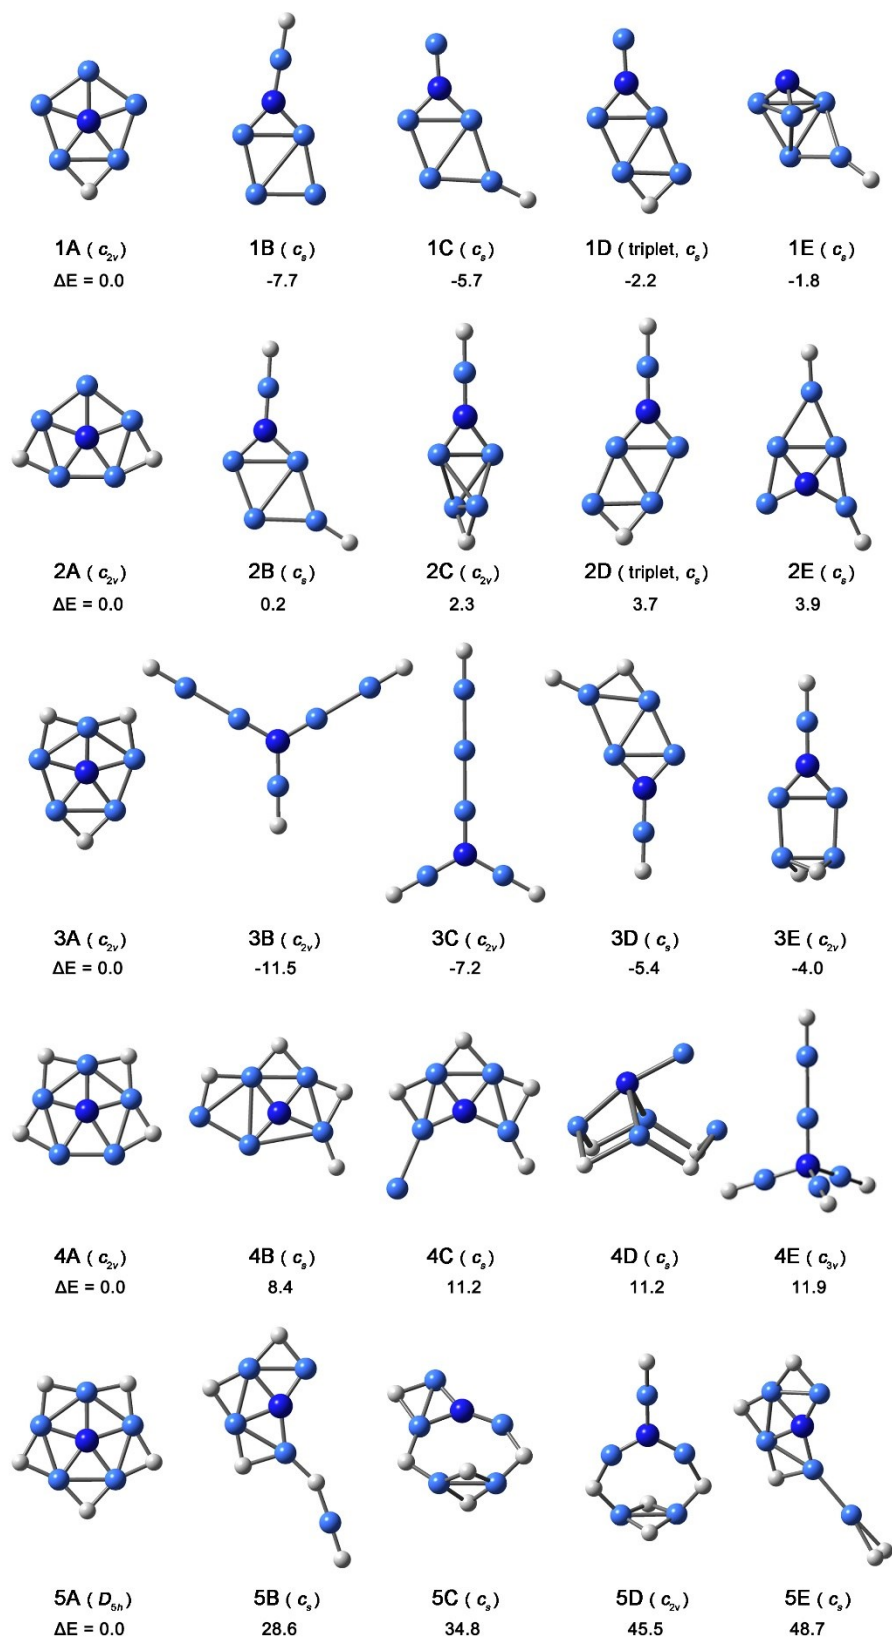

Fig.S4 The five independent 20 ps BOMD simulations of 2A–5A at 500 K.

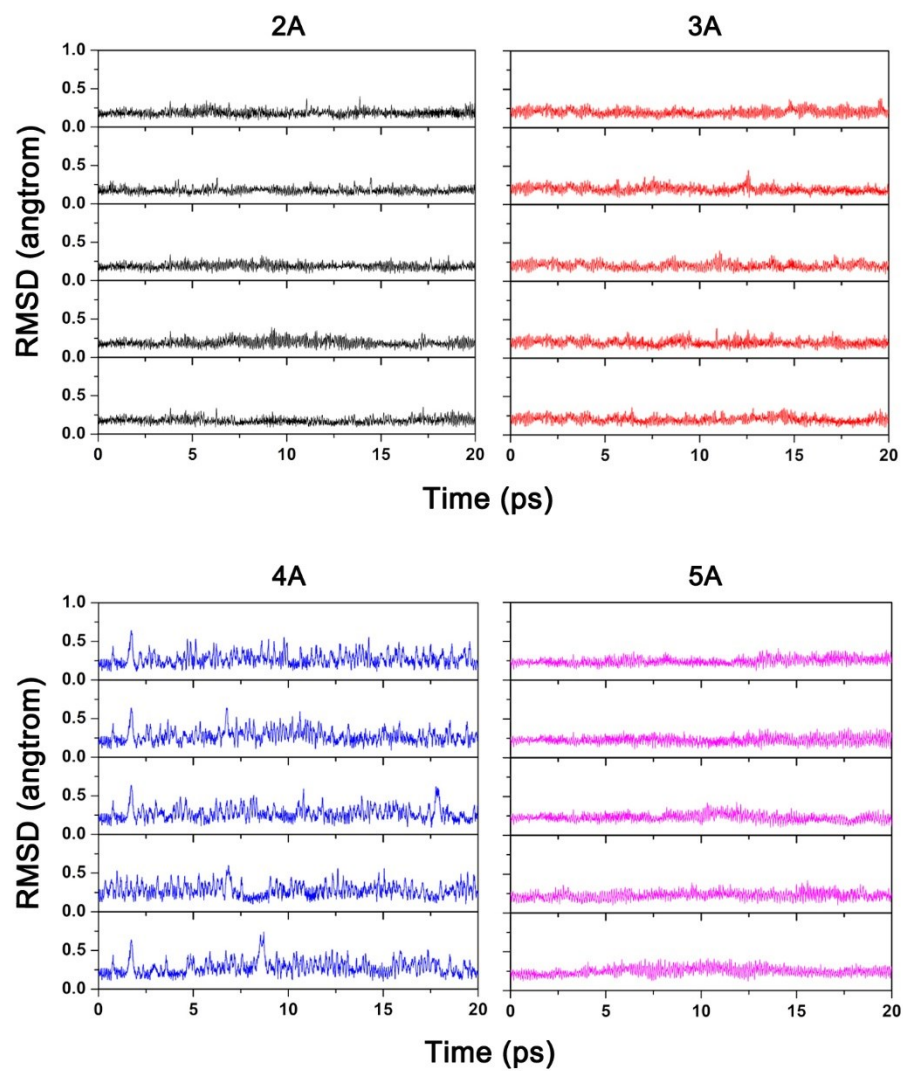

**Fig.S5** The energy profile for the generation of **4C** from **4A**. The relative energies ( $\Delta E$ , in kcal/mol) were calculated at the CCSD(T)//B3LYP level.

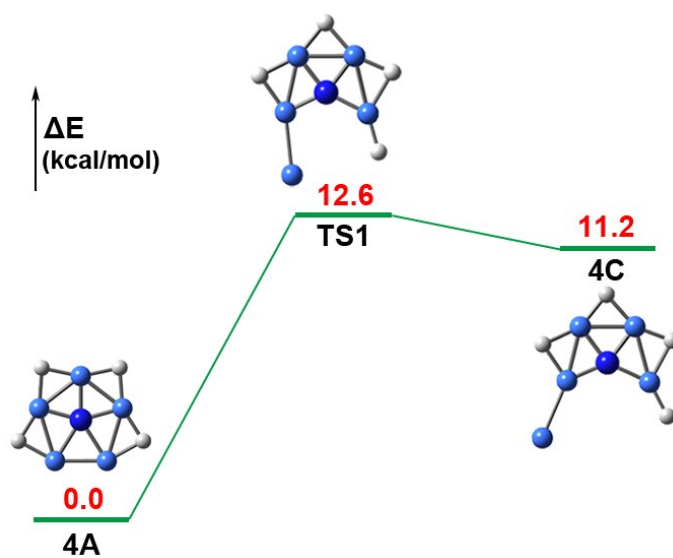

## Cartesian coordinates of optimized structures of the species reported in the text.

Cartesian coordinates of structures optimized at the B3LYP/aug-cc-pVTZ level. The total energies (E) were reported at the CCSD(T)//B3LYP level.

|                       |          |           |           |                       |           |           |           |
|-----------------------|----------|-----------|-----------|-----------------------|-----------|-----------|-----------|
| <b>0A</b>             |          |           |           | H                     | 0.000000  | 0.000000  | 2.419563  |
| Be                    | 0.000000 | 0.000000  | -1.690428 |                       |           |           |           |
| Be                    | 0.000000 | 0.993611  | 1.367588  | <b>4A</b>             |           |           |           |
| Be                    | 0.000000 | 1.607698  | -0.522372 | E= -130.31261006 a.u. |           |           |           |
| Be                    | 0.000000 | -1.607698 | -0.522372 | N                     | 0.000000  | 0.000000  | 0.000953  |
| Be                    | 0.000000 | -0.993611 | 1.367588  | Be                    | 0.000000  | 0.949031  | -1.505749 |
| N                     | 0.000000 | 0.000000  | -0.000002 | Be                    | 0.000000  | -1.526521 | 0.421957  |
|                       |          |           |           | Be                    | 0.000000  | -0.949031 | -1.505749 |
| <b>1A</b>             |          |           |           | Be                    | 0.000000  | 0.000000  | 1.602171  |
| E= -128.62767750 a.u. |          |           |           | Be                    | 0.000000  | 1.526521  | 0.421957  |
| N                     | 0.000000 | 0.000000  | 0.054021  | H                     | 0.000000  | -2.283018 | -0.777526 |
| Be                    | 0.000000 | 0.998018  | -1.246199 | H                     | 0.000000  | -1.426655 | 1.905014  |
| Be                    | 0.000000 | 0.000000  | 1.760136  | H                     | 0.000000  | 1.426655  | 1.905014  |
| Be                    | 0.000000 | -0.998018 | -1.246199 | H                     | 0.000000  | 2.283018  | -0.777526 |
| Be                    | 0.000000 | 1.615438  | 0.610520  |                       |           |           |           |
| Be                    | 0.000000 | -1.615438 | 0.610520  | <b>5A</b>             |           |           |           |
| H                     | 0.000000 | 0.000000  | -2.333261 | E= -130.55159375 a.u. |           |           |           |
|                       |          |           |           | N                     | -0.000005 | 0.000000  | 0.000000  |
| <b>2A</b>             |          |           |           | Be                    | -1.662397 | 0.000000  | 0.000000  |
| E= -129.34549172 a.u. |          |           |           | Be                    | 1.344910  | -0.977133 | 0.000000  |
| N                     | 0.000000 | 0.000000  | 0.016433  | Be                    | -0.513709 | -1.581039 | 0.000000  |
| Be                    | 0.000000 | 0.945386  | -1.320171 | Be                    | 1.344910  | 0.977133  | 0.000000  |
| Be                    | 0.000000 | 0.000000  | 1.777703  | Be                    | -0.513709 | 1.581039  | 0.000000  |
| Be                    | 0.000000 | 1.537444  | 0.594143  | H                     | 0.747697  | -2.301176 | 0.000000  |
| Be                    | 0.000000 | -1.537444 | 0.594143  | H                     | 2.419600  | 0.000000  | 0.000000  |
| Be                    | 0.000000 | -0.945386 | -1.320171 | H                     | 0.747697  | 2.301176  | 0.000000  |
| H                     | 0.000000 | -2.272401 | -0.708813 | H                     | -1.957494 | 1.422206  | 0.000000  |
| H                     | 0.000000 | 2.272401  | -0.708813 | H                     | -1.957494 | -1.422206 | 0.000000  |
|                       |          |           |           |                       |           |           |           |
| <b>3A</b>             |          |           |           | <b>1B</b>             |           |           |           |
| E= -129.91326948 a.u. |          |           |           | E= -128.63996627 a.u. |           |           |           |
| N                     | 0.000000 | 0.000000  | 0.024093  | N                     | 0.849959  | -0.394741 | 0.000000  |
| Be                    | 0.000000 | 1.629721  | -0.428588 | Be                    | -1.874525 | 1.793212  | 0.000000  |
| Be                    | 0.000000 | -1.008066 | 1.355316  | Be                    | 0.000000  | 0.904360  | 0.000000  |
| Be                    | 0.000000 | -1.629721 | -0.428588 | Be                    | -2.359597 | -0.189205 | 0.000000  |
| Be                    | 0.000000 | 1.008066  | 1.355316  | Be                    | 2.325575  | -0.519065 | 0.000000  |
| Be                    | 0.000000 | 0.000000  | -1.533220 | Be                    | -0.494227 | -1.136724 | 0.000000  |
| H                     | 0.000000 | 1.371047  | -1.934579 | H                     | 3.661382  | -0.647126 | 0.000000  |
| H                     | 0.000000 | -1.371047 | -1.934579 |                       |           |           |           |

**1C**

E= -128.63679569 a.u.

|    |           |           |          |
|----|-----------|-----------|----------|
| N  | -1.139410 | -0.241855 | 0.000000 |
| Be | 0.000000  | 0.782234  | 0.000000 |
| Be | -2.655152 | -0.269564 | 0.000000 |
| Be | -0.112213 | -1.364263 | 0.000000 |
| Be | 1.913372  | -0.728919 | 0.000000 |
| Be | 2.141265  | 1.363972  | 0.000000 |
| H  | 2.826789  | 2.559143  | 0.000000 |

**1D**

E= -128.63120848 a.u.

|    |           |           |          |
|----|-----------|-----------|----------|
| N  | -1.130274 | -0.303907 | 0.000000 |
| Be | 1.886797  | 1.630933  | 0.000000 |
| Be | 1.886269  | -0.324943 | 0.000000 |
| Be | -2.613745 | -0.448204 | 0.000000 |
| Be | 0.000000  | 0.766514  | 0.000000 |
| Be | 0.074433  | -1.246218 | 0.000000 |
| H  | 2.976902  | 0.615020  | 0.000000 |

**1E**

E= -128.63050766 a.u.

|    |           |           |           |
|----|-----------|-----------|-----------|
| N  | -1.217657 | 0.464273  | 0.000000  |
| Be | 1.223555  | -1.588738 | 0.000000  |
| Be | -0.328660 | -0.341027 | 1.008391  |
| Be | -0.328660 | -0.341027 | -1.008391 |
| Be | -0.328660 | 1.679508  | 0.000000  |
| Be | 1.417893  | 0.474875  | 0.000000  |
| H  | 1.901730  | -2.784276 | 0.000000  |

**2B**

E= -129.34524040 a.u.

|    |           |           |          |
|----|-----------|-----------|----------|
| N  | 0.937586  | -0.428169 | 0.000000 |
| Be | 0.000000  | 0.805658  | 0.000000 |
| Be | -1.969364 | 1.690383  | 0.000000 |
| Be | 2.417765  | -0.497130 | 0.000000 |
| Be | -0.243098 | -1.396814 | 0.000000 |
| Be | -2.138743 | -0.434990 | 0.000000 |
| H  | -2.586609 | 2.910807  | 0.000000 |
| H  | 3.757270  | -0.582052 | 0.000000 |

**2C**

E= -129.34185529 a.u.

|   |          |          |          |
|---|----------|----------|----------|
| N | 0.000000 | 0.000000 | 1.004694 |
|---|----------|----------|----------|

|    |           |           |           |
|----|-----------|-----------|-----------|
| Be | 0.000000  | 0.951753  | -0.242891 |
| Be | 0.939855  | 0.000000  | -1.960378 |
| Be | -0.939855 | 0.000000  | -1.960378 |
| Be | 0.000000  | 0.000000  | 2.469983  |
| Be | 0.000000  | -0.951753 | -0.242891 |
| H  | 0.000000  | 0.000000  | 3.818475  |
| H  | 0.000000  | 0.000000  | -3.105105 |

**2D**

E= -129.33965449 a.u.

|    |           |           |          |
|----|-----------|-----------|----------|
| N  | 0.921936  | -0.487195 | 0.000000 |
| Be | 2.358805  | -0.805532 | 0.000000 |
| Be | -1.653961 | 1.967122  | 0.000000 |
| Be | 0.000000  | 0.782266  | 0.000000 |
| Be | -2.050016 | 0.060677  | 0.000000 |
| Be | -0.453147 | -1.176508 | 0.000000 |
| H  | -2.929502 | 1.206555  | 0.000000 |
| H  | 3.669227  | -1.108292 | 0.000000 |

**2E**

E= -129.33936278 a.u.

|    |           |           |          |
|----|-----------|-----------|----------|
| N  | 0.000000  | 0.685741  | 0.000000 |
| Be | -0.261095 | -2.490313 | 0.000000 |
| Be | -1.266340 | 1.526024  | 0.000000 |
| Be | -1.161911 | -0.458569 | 0.000000 |
| Be | 0.822220  | -0.714853 | 0.000000 |
| Be | 1.451508  | 1.286591  | 0.000000 |
| H  | 2.180081  | 2.427157  | 0.000000 |
| H  | -0.517606 | -3.822859 | 0.000000 |

**3B**

E= -129.93162451 a.u.

|    |           |           |          |
|----|-----------|-----------|----------|
| N  | 0.000000  | 0.549965  | 0.000000 |
| Be | 0.005801  | 2.052580  | 0.000000 |
| Be | -3.091748 | -1.242242 | 0.000000 |
| Be | -1.305014 | -0.202305 | 0.000000 |
| Be | 1.301432  | -0.207498 | 0.000000 |
| Be | 3.087959  | -1.247962 | 0.000000 |
| H  | -4.242907 | -1.916726 | 0.000000 |
| H  | 0.010411  | 3.379141  | 0.000000 |
| H  | 4.238778  | -1.922467 | 0.000000 |

**3C**

E= -129.92470516 a.u.

|    |           |           |          |
|----|-----------|-----------|----------|
| N  | 0.007587  | -1.387093 | 0.000000 |
| Be | -0.011772 | 2.211305  | 0.000000 |
| Be | -1.297616 | -2.130023 | 0.000000 |
| Be | 1.320726  | -2.116083 | 0.000000 |
| Be | -0.024095 | 4.311931  | 0.000000 |
| Be | 0.000000  | 0.122639  | 0.000000 |
| H  | -2.452757 | -2.782182 | 0.000000 |
| H  | 2.482572  | -2.756303 | 0.000000 |
| H  | -0.031894 | 5.649062  | 0.000000 |

**3D**

E= -129.92194698 a.u.

|    |           |           |          |
|----|-----------|-----------|----------|
| N  | 1.065938  | -0.436330 | 0.000000 |
| Be | -1.906562 | -0.404737 | 0.000000 |
| Be | 2.564943  | -0.493823 | 0.000000 |
| Be | -0.126909 | -1.370896 | 0.000000 |
| Be | -1.995186 | 1.664702  | 0.000000 |
| Be | 0.000000  | 0.660406  | 0.000000 |
| H  | -3.003369 | 0.477013  | 0.000000 |
| H  | 3.890836  | -0.549126 | 0.000000 |
| H  | -2.494177 | 2.903807  | 0.000000 |

**3E**

E= -129.91958283 a.u.

|    |           |           |           |
|----|-----------|-----------|-----------|
| N  | 0.000000  | 0.000000  | 1.089076  |
| Be | 0.000000  | 0.000000  | 2.582876  |
| Be | 0.000000  | 0.930683  | -2.072882 |
| Be | 0.000000  | 1.040366  | -0.017178 |
| Be | 0.000000  | -1.040366 | -0.017178 |
| Be | 0.000000  | -0.930683 | -2.072882 |
| H  | -1.035095 | 0.000000  | -2.573053 |
| H  | 0.000000  | 0.000000  | 3.911556  |
| H  | 1.035095  | 0.000000  | -2.573053 |

**4B**

E= -130.29920352 a.u.

|    |           |           |          |
|----|-----------|-----------|----------|
| N  | 0.000000  | 0.283030  | 0.000000 |
| Be | -0.511663 | -1.208648 | 0.000000 |
| Be | 1.510182  | 0.039065  | 0.000000 |
| Be | -0.289455 | 1.905067  | 0.000000 |
| Be | -1.579866 | 0.399470  | 0.000000 |
| Be | 1.649404  | -1.946095 | 0.000000 |
| H  | -1.873140 | 1.761466  | 0.000000 |
| H  | 0.473385  | 2.987726  | 0.000000 |

|   |           |           |          |
|---|-----------|-----------|----------|
| H | -1.971613 | -1.018152 | 0.000000 |
| H | 0.256957  | -2.467692 | 0.000000 |

**4C**

E= -130.29469695 a.u.

|    |           |           |          |
|----|-----------|-----------|----------|
| N  | 0.000000  | 0.244035  | 0.000000 |
| Be | -0.659964 | 1.686751  | 0.000000 |
| Be | -0.118888 | -1.286879 | 0.000000 |
| Be | -1.553338 | 0.000991  | 0.000000 |
| Be | 1.290210  | 1.225635  | 0.000000 |
| Be | 1.234240  | -2.981939 | 0.000000 |
| H  | -2.118018 | 1.338111  | 0.000000 |
| H  | -1.637319 | -1.441974 | 0.000000 |
| H  | 2.615988  | 1.211703  | 0.000000 |
| H  | 0.370311  | 2.605675  | 0.000000 |

**4D**

E= -130.29470579 a.u.

|    |           |           |           |
|----|-----------|-----------|-----------|
| N  | 0.181189  | 0.788641  | 0.000000  |
| Be | -1.463304 | -0.944035 | 0.000000  |
| Be | -1.308160 | 1.042793  | 0.000000  |
| Be | 0.181189  | -0.326741 | 1.215160  |
| Be | 1.635015  | 0.179236  | 0.000000  |
| Be | 0.181189  | -0.326741 | -1.215160 |
| H  | -0.722393 | -1.431898 | -1.173116 |
| H  | -0.722393 | -1.431898 | 1.173116  |
| H  | 1.636367  | -0.577371 | -1.258868 |
| H  | 1.636367  | -0.577371 | 1.258868  |

**4E**

E= -130.29363838 a.u.

|    |           |           |           |
|----|-----------|-----------|-----------|
| N  | 0.000000  | 0.000000  | 0.556992  |
| Be | 0.000000  | 0.000000  | -3.133136 |
| Be | 0.000000  | 1.506884  | 1.068911  |
| Be | -1.305000 | -0.753442 | 1.068911  |
| Be | 0.000000  | 0.000000  | -1.051304 |
| Be | 1.305000  | -0.753442 | 1.068911  |
| H  | -2.377295 | -1.372532 | 1.486833  |
| H  | 0.000000  | 2.745064  | 1.486833  |
| H  | 0.000000  | 0.000000  | -4.448612 |
| H  | 2.377295  | -1.372532 | 1.486833  |

**5B**

E= -130.50604376 a.u.



|    |           |           |          |
|----|-----------|-----------|----------|
| N  | 0.000000  | 0.659418  | 0.000000 |
| Be | -0.851916 | 1.914620  | 0.000000 |
| Be | -0.159882 | -0.922407 | 0.000000 |
| Be | 1.049343  | 1.925582  | 0.000000 |
| Be | -1.656696 | -3.266675 | 0.000000 |
| Be | 1.517923  | 0.060320  | 0.000000 |
| H  | 0.038567  | 3.034582  | 0.000000 |
| H  | 2.339726  | 1.272007  | 0.000000 |
| H  | -1.190345 | -1.913203 | 0.000000 |
| H  | 1.269647  | -1.347518 | 0.000000 |
| H  | -2.052680 | -4.507560 | 0.000000 |

**5C**

E= -130.49618227 a.u.

|    |           |           |           |
|----|-----------|-----------|-----------|
| N  | 0.000000  | 0.999095  | 0.000000  |
| Be | 1.510727  | -1.678690 | 0.000000  |
| Be | -1.059397 | 2.065760  | 0.000000  |
| Be | -1.357984 | 0.207354  | 0.000000  |
| Be | 1.429351  | 0.628182  | 0.000000  |
| Be | -0.408918 | -1.913220 | 0.000000  |
| H  | -2.314214 | 1.385921  | 0.000000  |
| H  | 0.585244  | -1.950534 | 1.074075  |
| H  | 2.314502  | -0.492429 | 0.000000  |
| H  | -1.625892 | -1.223635 | 0.000000  |
| H  | 0.585244  | -1.950534 | -1.074075 |

**5D**

E= -130.47915721 a.u.

|    |           |           |           |
|----|-----------|-----------|-----------|
| N  | 0.000000  | 0.000000  | 1.019407  |
| Be | 0.000000  | 0.971527  | -2.112327 |
| Be | 0.000000  | 0.000000  | 2.590547  |
| Be | 0.000000  | -1.272781 | 0.259006  |
| Be | 0.000000  | 1.272781  | 0.259006  |
| Be | 0.000000  | -0.971527 | -2.112327 |
| H  | 1.073588  | 0.000000  | -2.255461 |
| H  | -1.073588 | 0.000000  | -2.255461 |
| H  | 0.000000  | 1.899532  | -1.029474 |
| H  | 0.000000  | -1.899532 | -1.029474 |
| H  | 0.000000  | 0.000000  | 3.898399  |

**5E**

E= -130.47405822 a.u.

|    |           |           |           |
|----|-----------|-----------|-----------|
| N  | -0.592581 | -0.239382 | 0.000096  |
| Be | -0.684981 | 1.377238  | -0.001679 |

|    |           |           |           |
|----|-----------|-----------|-----------|
| Be | -2.170782 | 0.168291  | -0.000243 |
| Be | 0.954682  | 0.267168  | -0.000240 |
| Be | 3.004071  | -0.194231 | -0.000233 |
| Be | -1.354909 | -1.536424 | 0.002205  |
| H  | -2.750155 | -1.225004 | 0.002186  |
| H  | 4.750686  | -0.035790 | 0.044538  |
| H  | 4.650299  | -0.793090 | -0.042819 |
| H  | 0.648044  | 1.794045  | -0.001889 |
| H  | -2.143131 | 1.607348  | -0.001927 |

**2A'**

E= -129.32806008 a.u.

|    |          |           |           |
|----|----------|-----------|-----------|
| N  | 0.000000 | 0.000000  | 0.059536  |
| Be | 0.000000 | 1.600020  | -0.347340 |
| Be | 0.000000 | -0.984574 | 1.518608  |
| Be | 0.000000 | -1.600020 | -0.347340 |
| Be | 0.000000 | 0.984574  | 1.518608  |
| Be | 0.000000 | 0.000000  | -1.492043 |
| H  | 0.000000 | 1.358590  | -1.909361 |
| H  | 0.000000 | -1.358590 | -1.909361 |

**3 A'**

E= -129.89819251 a.u.

|    |           |           |           |
|----|-----------|-----------|-----------|
| N  | -0.360635 | -0.132530 | 0.000000  |
| Be | 0.358253  | 2.278302  | 0.000000  |
| Be | 0.012645  | -1.280000 | 0.969105  |
| Be | 0.012645  | 0.728386  | 1.310697  |
| Be | 0.012645  | -1.280000 | -0.969105 |
| Be | 0.012645  | 0.728386  | -1.310697 |
| H  | 0.286373  | -0.691201 | 2.220148  |
| H  | 0.316370  | -2.390189 | 0.000000  |
| H  | 0.286373  | -0.691201 | -2.220148 |

**TS1**

E= -130.29247475 a.u.

|    |           |           |           |
|----|-----------|-----------|-----------|
| N  | 0.191324  | 0.007876  | -0.000076 |
| Be | -2.834169 | 0.127107  | 0.000000  |
| Be | 0.902963  | -1.381535 | 0.000086  |
| Be | -1.000405 | -0.968379 | -0.000097 |
| Be | 1.720357  | 0.369053  | 0.000051  |
| Be | 0.136647  | 1.602676  | -0.000005 |
| H  | -0.241195 | -2.290722 | 0.000034  |
| H  | 2.324417  | -1.011975 | 0.000183  |
| H  | 1.761078  | 1.773421  | 0.000116  |

|   |           |          |          |   |          |          |           |
|---|-----------|----------|----------|---|----------|----------|-----------|
| H | -0.885138 | 2.478454 | 0.000061 | H | 0.000000 | 2.296739 | -0.780205 |
|---|-----------|----------|----------|---|----------|----------|-----------|

MP2/aug-cc-pVTZ-optimized structures (in Cartesian coordinates) for **1A–5A**

**1A**

|    |          |           |           |
|----|----------|-----------|-----------|
| N  | 0.000000 | 0.000000  | 0.057252  |
| Be | 0.000000 | 1.010793  | -1.265677 |
| Be | 0.000000 | 0.000000  | 1.785949  |
| Be | 0.000000 | -1.010793 | -1.265677 |
| Be | 0.000000 | 1.643002  | 0.616494  |
| Be | 0.000000 | -1.643002 | 0.616494  |
| H  | 0.000000 | 0.000000  | -2.351097 |

**2A**

|    |          |           |           |
|----|----------|-----------|-----------|
| N  | 0.000000 | 0.000000  | 0.017846  |
| Be | 0.000000 | 0.957574  | -1.335332 |
| Be | 0.000000 | 0.000000  | 1.798236  |
| Be | 0.000000 | 1.556911  | 0.598909  |
| Be | 0.000000 | -1.556911 | 0.598909  |
| Be | 0.000000 | -0.957574 | -1.335332 |
| H  | 0.000000 | -2.287325 | -0.713243 |
| H  | 0.000000 | 2.287325  | -0.713243 |

**3A**

|    |          |           |           |
|----|----------|-----------|-----------|
| N  | 0.000000 | 0.000000  | 0.025470  |
| Be | 0.000000 | 1.647530  | -0.434964 |
| Be | 0.000000 | -1.019418 | 1.369606  |
| Be | 0.000000 | -1.647530 | -0.434964 |
| Be | 0.000000 | 1.019418  | 1.369606  |
| Be | 0.000000 | 0.000000  | -1.549058 |
| H  | 0.000000 | 1.378673  | -1.946593 |
| H  | 0.000000 | -1.378673 | -1.946593 |
| H  | 0.000000 | 0.000000  | 2.433991  |

**4A**

|    |          |           |           |
|----|----------|-----------|-----------|
| N  | 0.000000 | 0.000000  | -0.000939 |
| Be | 0.000000 | 0.959120  | -1.518475 |
| Be | 0.000000 | -1.541826 | 0.426852  |
| Be | 0.000000 | -0.959120 | -1.518475 |
| Be | 0.000000 | 0.000000  | 1.617272  |
| Be | 0.000000 | 1.541826  | 0.426852  |
| H  | 0.000000 | -2.296739 | -0.780205 |
| H  | 0.000000 | -1.434752 | 1.915441  |
| H  | 0.000000 | 1.434752  | 1.915441  |

**5A**

|    |          |           |           |
|----|----------|-----------|-----------|
| N  | 0.000000 | 0.000000  | 0.000002  |
| Be | 0.000000 | 0.000000  | 1.678342  |
| Be | 0.000000 | 0.986504  | -1.357806 |
| Be | 0.000000 | 1.596201  | 0.518634  |
| Be | 0.000000 | -0.986504 | -1.357806 |
| Be | 0.000000 | -1.596201 | 0.518634  |
| H  | 0.000000 | 2.313735  | -0.751784 |
| H  | 0.000000 | 0.000000  | -2.432805 |
| H  | 0.000000 | -2.313735 | -0.751784 |
| H  | 0.000000 | -1.429968 | 1.968183  |
| H  | 0.000000 | 1.429968  | 1.968183  |
